# Supplementary material
Source: Springer Nature journal article supplement (https://www.springermedizin.de/resource/supplementary/13054_2010_8704_MOESM1_ESM.pdf/9734042)

Patients included in the prospective survey  
N=1,702

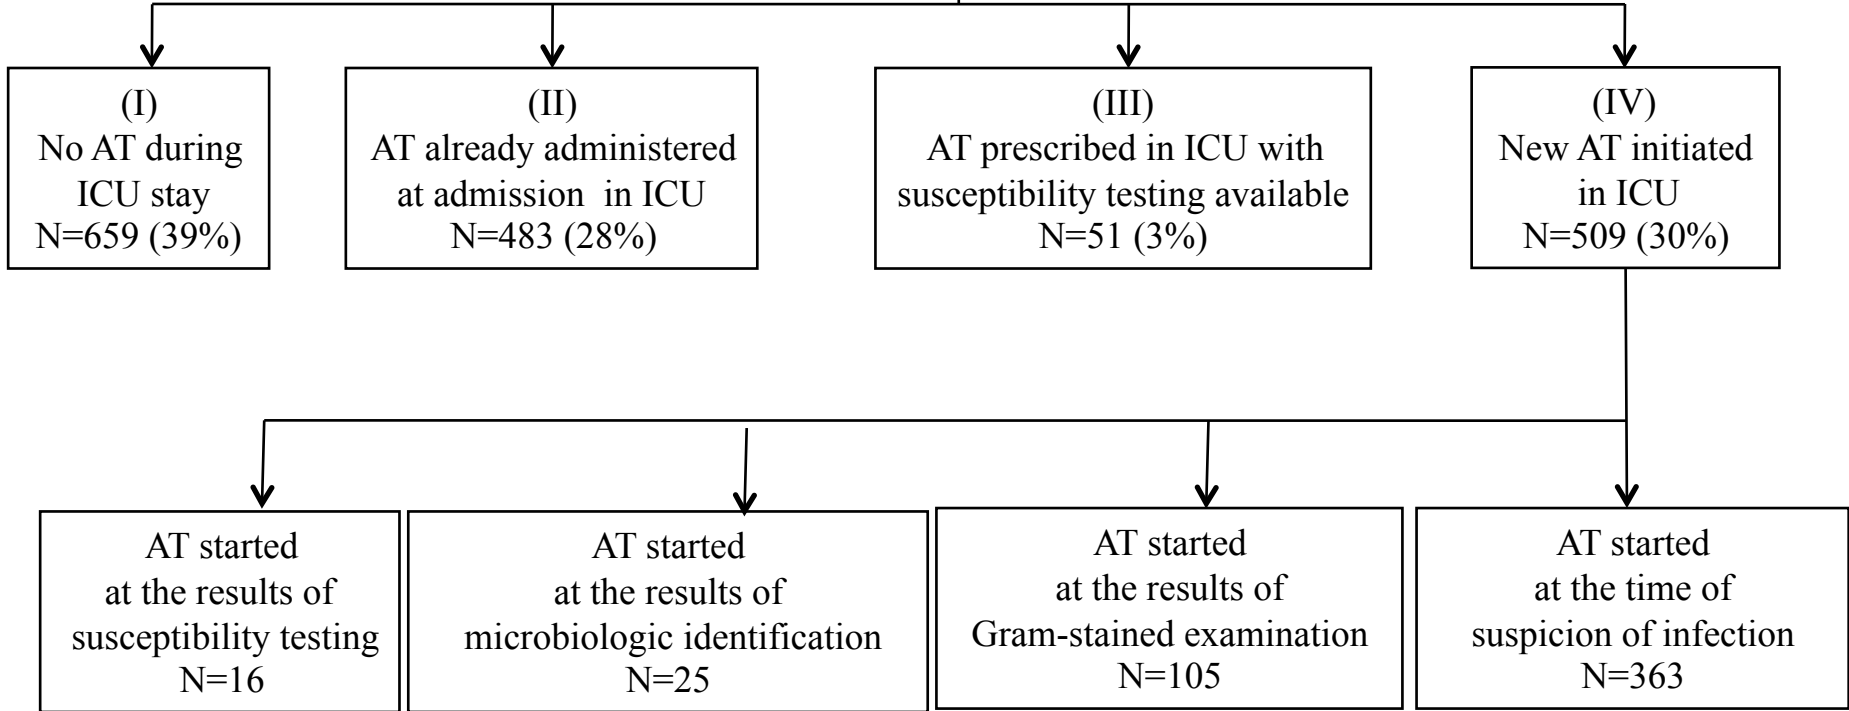

Supplement: MOESM1 [file 9734042]
